# Supplementary material for: Steered Molecular Dynamics of Lipid Membrane Indentation by Carbon and Silicon-Carbide Nanotubes—The Impact of Indenting Angle Uncertainty
Source: MDPI journal article supplement (doi:10.3390/s21217011), 2021-10-22
Supplement: s1 [file s1]

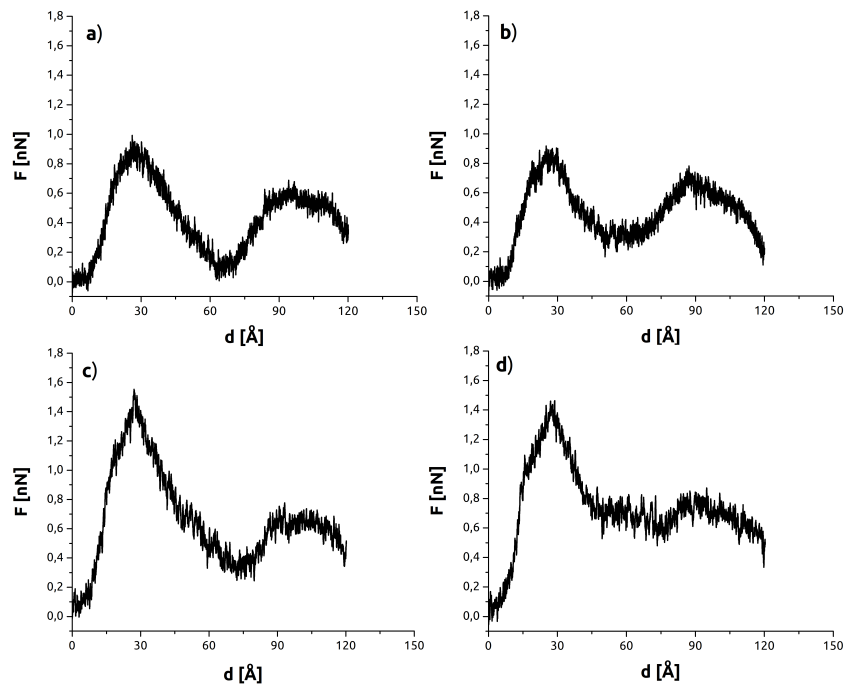

**Figure S1.** SMD force vs indenter depth for  $9^\circ$  simulation runs. a) Low rate ( $v = 0.5$  m/s), tube-axis indentation; b) Low rate ( $v = 0.5$  m/s), z-axis indentation; c) High rate ( $v = 2.0$  m/s), tube-axis indentation; d) High rate ( $v = 2.0$  m/s), z-axis indentation

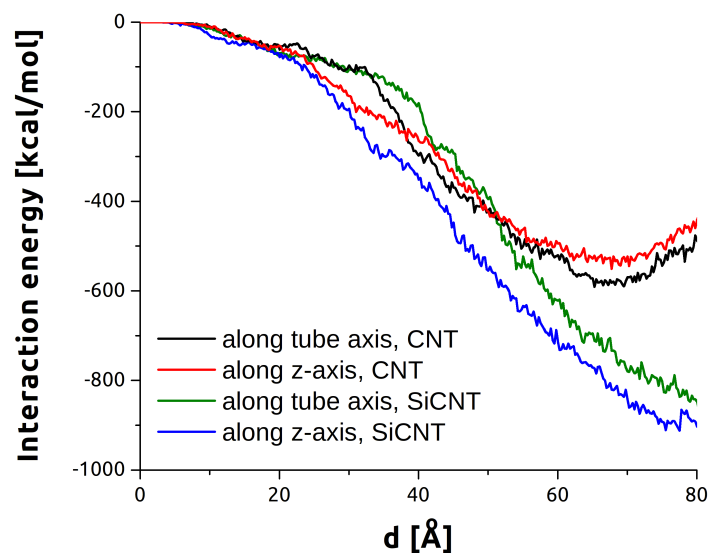

**Figure S2.** Total interaction energy between nanotube atoms and lipid molecules for cases at  $15^\circ$ . Each curve represents a single run.

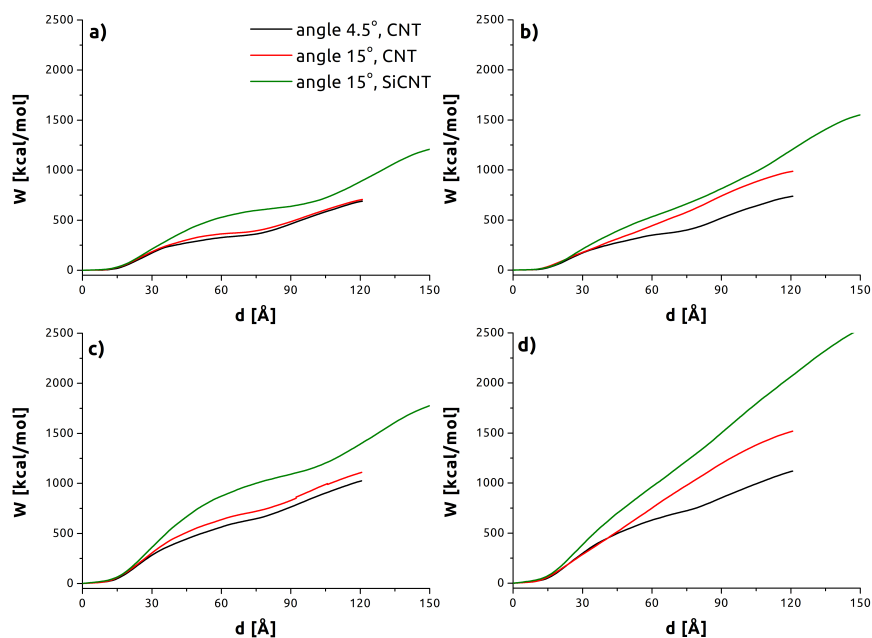

**Figure S3.** Average work input by SMD atoms vs indenter depth for the indentation process. Curves represent averages over each case. a) Low rate ( $v = 0.5$  m/s), tube-axis indentation; b) Low rate ( $v = 0.5$  m/s), z-axis indentation; c) High rate ( $v = 2.0$  m/s), tube-axis indentation; d) High rate ( $v = 2.0$  m/s), z-axis indentation

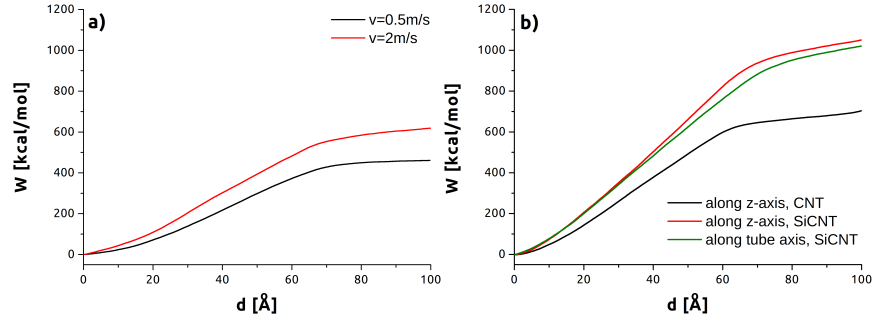

**Figure S4.** Total work input by SMD atoms vs indenter depth for the withdrawal process. Curves represent averages over each case. All cases simulated were angled at  $15^\circ$ . Left: Rate comparison (CNT, tube-axis indentation). Right: Nanotube comparison (CNT/SiCNT high rate indentation).

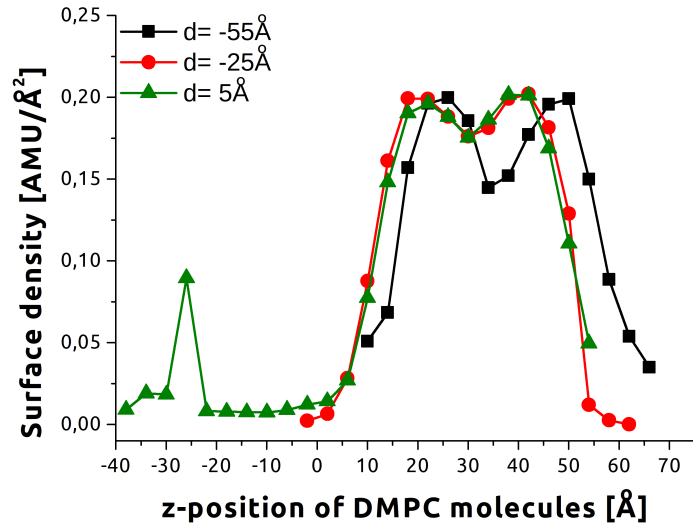

**Figure 5.** The average membrane density profile along the z-axis for withdrawal. Data is for the SiCNT indenter at  $2\text{ m/s}$ , a  $15^\circ$  angle directed along the z-axis
